# Supplementary material for: Transcriptome Sequencing of Codonopsis pilosula and Identification of Candidate Genes Involved in Polysaccharide Biosynthesis
Source: PLoS One. 2015 Feb 26;10(2):e0117342. doi: 10.1371/journal.pone.0117342 (PMC4342239; doi:10.1371/journal.pone.0117342)
Supplement: S4 Table — (XLSX) [file pone.0117342.s007.xlsx]

## Sheet: manA
geneID	Nr-ID	Nr-Score	Nr-Evalue	Nr-annotation	Nt-ID	Nt-Score	Nt-Evalue	Nt-annotation	Swissprot-ID	Swissprot-Score	Swissprot-Evalue	Swissprot-annotation	KO_id	KEGG-Evalue	KEGG-Score	KEGG-Gene	ko_definition
CL3595.Contig1_Codonopsis	gi|464895751|gb|AGH25529.1|	53.5	1e-06	phosphomannose isomerase [Prunus persica]	--	--	--	--	sp|Q9M884|MPI1_ARATH	50.8	3e-07	Mannose-6-phosphate isomerase 1 OS=Arabidopsis thaliana GN=PMI1 PE=1 SV=1	K01809	8e-07	50.8	ath:AT3G02570	mannose-6-phosphate isomerase [EC:5.3.1.8]
Unigene186_Codonopsis	gi|224079321|ref|XP_002305820.1|	599.4	6e-170	predicted protein [Populus trichocarpa] >gi|222848784|gb|EEE86331.1| predicted protein [Populus trichocarpa]	gi|225452054|ref|XM_002283890.1|	165	2e-37	PREDICTED: Vitis vinifera mannose-6-phosphate isomerase-like (LOC100263511), mRNA	sp|Q9M884|MPI1_ARATH	516	2e-146	Mannose-6-phosphate isomerase 1 OS=Arabidopsis thaliana GN=PMI1 PE=1 SV=1	K01809	5e-171	599	pop:POPTR_758948	mannose-6-phosphate isomerase [EC:5.3.1.8]

## Sheet: GPI
geneID	Nr-ID	Nr-Score	Nr-Evalue	Nr-annotation	Nt-ID	Nt-Score	Nt-Evalue	Nt-annotation	Swissprot-ID	Swissprot-Score	Swissprot-Evalue	Swissprot-annotation	KO_id	KEGG-Evalue	KEGG-Score	KEGG-Gene	ko_definition
Unigene12680_Codonopsis	gi|462418948|gb|EMJ23211.1|	1075.1	0	hypothetical protein PRUPE_ppa002932mg [Prunus persica]	gi|359492932|ref|XM_002285660.2|	1255	0	PREDICTED: Vitis vinifera glucose-6-phosphate isomerase-like, transcript variant 1 (LOC100262681), mRNA	sp|Q8H103|G6PIP_ARATH	1028	0	Glucose-6-phosphate isomerase 1, chloroplastic OS=Arabidopsis thaliana GN=PGI1 PE=1 SV=1	K01810	0	1064	gmx:100791285	glucose-6-phosphate isomerase [EC:5.3.1.9]
Unigene17918_Codonopsis	gi|90992880|gb|ABE03628.1|	1020.4	0	glucose-6-phosphate isomerase [Solanum lycopersicum]	gi|225458304|ref|XM_002282738.1|	1170	0	PREDICTED: Vitis vinifera glucose-6-phosphate isomerase (LOC100252335), mRNA	sp|P54237|G6PI1_CLAMI	994	0	Glucose-6-phosphate isomerase, cytosolic 1 OS=Clarkia mildrediae GN=PGIC1 PE=3 SV=1	K01810	0	1012	vvi:100252335	glucose-6-phosphate isomerase [EC:5.3.1.9]

## Sheet: manB
geneID	Nr-ID	Nr-Score	Nr-Evalue	Nr-annotation	Nt-ID	Nt-Score	Nt-Evalue	Nt-annotation	Swissprot-ID	Swissprot-Score	Swissprot-Evalue	Swissprot-annotation	KO_id	KEGG-Evalue	KEGG-Score	KEGG-Gene	ko_definition
Unigene10201_Codonopsis	gi|225424281|ref|XP_002280911.1|	540	2e-152	PREDICTED: phosphomannomutase/phosphoglucomutase [Vitis vinifera] >gi|297737677|emb|CBI26878.3| unnamed protein product [Vitis vinifera]	gi|460387327|ref|XM_004239282.1|	216	3e-53	PREDICTED: Solanum lycopersicum phosphomannomutase/phosphoglucomutase-like (LOC101267404), mRNA	--	--	--	--	K01840	4e-108	389	osa:4341038	phosphomannomutase [EC:5.4.2.8]
Unigene11590_Codonopsis	gi|351727304|ref|NP_001237668.1|	442.2	7e-123	phosphomannomutase [Glycine max] >gi|122194126|sp|Q1W376.1|PMM_SOYBN RecName: Full=Phosphomannomutase; AltName: Full=GmPMM >gi|90762150|gb|ABD97873.1| phosphomannomutase [Glycine max]	gi|349703507|emb|FQ383446.1|	490	1e-135	Vitis vinifera clone SS0ABG1YO02	sp|Q1W376|PMM_SOYBN	442	2e-124	Phosphomannomutase OS=Glycine max PE=2 SV=1	K01840	6e-124	442	gmx:732605	phosphomannomutase [EC:5.4.2.8]
Unigene11883_Codonopsis	gi|462418952|gb|EMJ23215.1|	489.2	4e-137	hypothetical protein PRUPE_ppa002940mg [Prunus persica]	gi|356576033|ref|XM_003556092.1|	260	2e-66	PREDICTED: Glycine max phosphomannomutase/phosphoglucomutase-like (LOC100810397), mRNA	--	--	--	--	K01840	2e-110	397	osa:4341038	phosphomannomutase [EC:5.4.2.8]
Unigene12670_Codonopsis	gi|359486666|ref|XP_002274127.2|	431	1e-119	PREDICTED: phosphoglucomutase-like [Vitis vinifera] >gi|296086013|emb|CBI31454.3| unnamed protein product [Vitis vinifera]	gi|359486665|ref|XM_002274091.2|	309	3e-81	PREDICTED: Vitis vinifera phosphoglucomutase-like (LOC100244432), mRNA	--	--	--	--	K01840	2e-36	150	cme:CMC121C	phosphomannomutase [EC:5.4.2.8]
Unigene12671_Codonopsis	gi|449490396|ref|XP_004158593.1|	578.9	5e-164	PREDICTED: phosphomannomutase/phosphoglucomutase-like [Cucumis sativus]	gi|359486665|ref|XM_002274091.2|	698	0	PREDICTED: Vitis vinifera phosphoglucomutase-like (LOC100244432), mRNA	--	--	--	--	K01840	3e-80	296	cme:CMC121C	phosphomannomutase [EC:5.4.2.8]

## Sheet: GMPP
geneID	Nr-ID	Nr-Score	Nr-Evalue	Nr-annotation	Nt-ID	Nt-Score	Nt-Evalue	Nt-annotation	Swissprot-ID	Swissprot-Score	Swissprot-Evalue	Swissprot-annotation	KO_id	KEGG-Evalue	KEGG-Score	KEGG-Gene	ko_definition
CL411.Contig1_Codonopsis	gi|224038262|gb|ACN38266.1|	695.7	0	GDP-D-mannose pyrophosphorylase [Actinidia latifolia]	gi|224038261|gb|FJ643600.1|	835	0	Actinidia latifolia GDP-D-mannose pyrophosphorylase (GMP) mRNA, complete cds	sp|O22287|GMPP1_ARATH	671	0	Mannose-1-phosphate guanylyltransferase 1 OS=Arabidopsis thaliana GN=CYT1 PE=1 SV=1	K00966	0	684	mtr:MTR_5g080770	mannose-1-phosphate guanylyltransferase [EC:2.7.7.13]
CL411.Contig2_Codonopsis	gi|224038262|gb|ACN38266.1|	695.7	0	GDP-D-mannose pyrophosphorylase [Actinidia latifolia]	gi|224038261|gb|FJ643600.1|	835	0	Actinidia latifolia GDP-D-mannose pyrophosphorylase (GMP) mRNA, complete cds	sp|O22287|GMPP1_ARATH	671	0	Mannose-1-phosphate guanylyltransferase 1 OS=Arabidopsis thaliana GN=CYT1 PE=1 SV=1	K00966	0	684	mtr:MTR_5g080770	mannose-1-phosphate guanylyltransferase [EC:2.7.7.13]
CL478.Contig3_Codonopsis	gi|470127258|ref|XP_004299591.1|	64.3	3e-09	PREDICTED: mannose-1-phosphate guanyltransferase alpha-like [Fragaria vesca subsp. vesca]	gi|470127257|ref|XM_004299543.1|	83.8	3e-13	PREDICTED: Fragaria vesca subsp. vesca mannose-1-phosphate guanyltransferase alpha-like (LOC101301200), mRNA	--	--	--	--	K00966	3e-10	63.9	pop:POPTR_835143	mannose-1-phosphate guanylyltransferase [EC:2.7.7.13]
CL478.Contig5_Codonopsis	gi|470127258|ref|XP_004299591.1|	64.3	2e-09	PREDICTED: mannose-1-phosphate guanyltransferase alpha-like [Fragaria vesca subsp. vesca]	gi|470127257|ref|XM_004299543.1|	83.8	3e-13	PREDICTED: Fragaria vesca subsp. vesca mannose-1-phosphate guanyltransferase alpha-like (LOC101301200), mRNA	--	--	--	--	K00966	3e-10	63.9	pop:POPTR_835143	mannose-1-phosphate guanylyltransferase [EC:2.7.7.13]
CL4932.Contig1_Codonopsis	gi|224135729|ref|XP_002322146.1|	763.5	0	predicted protein [Populus trichocarpa] >gi|222869142|gb|EEF06273.1| predicted protein [Populus trichocarpa]	gi|359491616|ref|XM_002283667.2|	839	0	PREDICTED: Vitis vinifera mannose-1-phosphate guanyltransferase alpha-like, transcript variant 1 (LOC100241648), mRNA	sp|O22287|GMPP1_ARATH	200	2e-51	Mannose-1-phosphate guanylyltransferase 1 OS=Arabidopsis thaliana GN=CYT1 PE=1 SV=1	K00966	0	763	pop:POPTR_835143	mannose-1-phosphate guanylyltransferase [EC:2.7.7.13]
CL4932.Contig2_Codonopsis	gi|462411611|gb|EMJ16660.1|	537	2e-151	hypothetical protein PRUPE_ppa006436mg [Prunus persica]	gi|359488768|ref|XM_002281923.2|	509	1e-141	PREDICTED: Vitis vinifera mannose-1-phosphate guanyltransferase alpha-like, transcript variant 1 (LOC100255999), mRNA	sp|O22287|GMPP1_ARATH	124	9e-29	Mannose-1-phosphate guanylyltransferase 1 OS=Arabidopsis thaliana GN=CYT1 PE=1 SV=1	K00966	2e-151	533	rcu:RCOM_1512730	mannose-1-phosphate guanylyltransferase [EC:2.7.7.13]
Unigene3475_Codonopsis	gi|462411611|gb|EMJ16660.1|	178.3	6e-44	hypothetical protein PRUPE_ppa006436mg [Prunus persica]	gi|470120962|ref|XM_004296507.1|	182	3e-43	PREDICTED: Fragaria vesca subsp. vesca mannose-1-phosphate guanyltransferase alpha-like (LOC101314646), mRNA	sp|Q941T9|GMPP2_ORYSJ	73.9	5e-14	Probable mannose-1-phosphate guanylyltransferase 2 OS=Oryza sativa subsp. japonica GN=Os01g0847200 PE=2 SV=1	K00966	1e-44	177	vvi:100241648	mannose-1-phosphate guanylyltransferase [EC:2.7.7.13]

## Sheet: pgm
geneID	Nr-ID	Nr-Score	Nr-Evalue	Nr-annotation	Nt-ID	Nt-Score	Nt-Evalue	Nt-annotation	Swissprot-ID	Swissprot-Score	Swissprot-Evalue	Swissprot-annotation	KO_id	KEGG-Evalue	KEGG-Score	KEGG-Gene	ko_definition
Unigene12191_Codonopsis	gi|225424316|ref|XP_002284729.1|	1061.6	0	PREDICTED: phosphoglucomutase, cytoplasmic [Vitis vinifera] >gi|297737663|emb|CBI26864.3| unnamed protein product [Vitis vinifera]	gi|359472837|ref|XM_002284693.2|	1207	0	PREDICTED: Vitis vinifera phosphoglucomutase, cytoplasmic-like (LOC100266376), mRNA	sp|Q9M4G4|PGMC_SOLTU	1031	0	Phosphoglucomutase, cytoplasmic OS=Solanum tuberosum GN=PGM1 PE=2 SV=1	K01835	0	1061	vvi:100266376	phosphoglucomutase [EC:5.4.2.2]
Unigene14957_Codonopsis	gi|225455657|ref|XP_002263813.1|	1065.5	0	PREDICTED: phosphoglucomutase, chloroplastic [Vitis vinifera] >gi|296084081|emb|CBI24469.3| unnamed protein product [Vitis vinifera]	gi|225455656|ref|XM_002263777.1|	1302	0	PREDICTED: Vitis vinifera phosphoglucomutase, chloroplastic-like (LOC100247590), mRNA	sp|Q9M4G5|PGMP_SOLTU	1056	0	Phosphoglucomutase, chloroplastic OS=Solanum tuberosum GN=PGMP PE=2 SV=1	K01835	0	1065	vvi:100247590	phosphoglucomutase [EC:5.4.2.2]

## Sheet: UGPase
geneID	Nr-ID	Nr-Score	Nr-Evalue	Nr-annotation	Nt-ID	Nt-Score	Nt-Evalue	Nt-annotation	Swissprot-ID	Swissprot-Score	Swissprot-Evalue	Swissprot-annotation	KO_id	KEGG-Evalue	KEGG-Score	KEGG-Gene	ko_definition
Unigene16117_Codonopsis	gi|225431563|ref|XP_002282276.1|	828	0	PREDICTED: UTP--glucose-1-phosphate uridylyltransferase isoform 1 [Vitis vinifera]uridylyltransferase isoform 1 [Vitis vinifera]	ref|XM_002282240.1|	733	0	PREDICTED: Vitis vinifera UTP--glucose-1-phosphate uridylyltransferase-like, transcript variant 1 (LOC100253896), mRNAmRNA, complete cds	sp|P19595|UGPA_SOLTU	812	0	UTP--glucose-1-phosphate uridylyltransferase OS=Solanum tuberosum PE=1 SV=3	K00963	6e-129	458	vvi:100253896	UTP--glucose-1-phosphate uridylyltransferase [EC:2.7.7.9]

## Sheet: RHM
geneID	Nr-ID	Nr-Score	Nr-Evalue	Nr-annotation	Nt-ID	Nt-Score	Nt-Evalue	Nt-annotation	Swissprot-ID	Swissprot-Score	Swissprot-Evalue	Swissprot-annotation	KO_id	KEGG-Evalue	KEGG-Score	KEGG-Gene	ko_definition
Unigene18627_Codonopsis	gi|225464343|ref|XP_002271970.1|	753.8	0	PREDICTED: probable rhamnose biosynthetic enzyme 1 [Vitis vinifera]	gi|460399561|ref|XR_183029.1|	355	8e-95	PREDICTED: Solanum lycopersicum probable rhamnose biosynthetic enzyme 1-like (LOC101248505), misc_RNA	sp|Q9LH76|RHM3_ARATH	704	0	Probable rhamnose biosynthetic enzyme 3 OS=Arabidopsis thaliana GN=RHM3 PE=1 SV=1	K12450	0	753	vvi:100253745	UDP-glucose 4,6-dehydratase [EC:4.2.1.76]
Unigene19141_Codonopsis	gi|449530476|ref|XP_004172221.1|	88.2	4e-17	PREDICTED: probable rhamnose biosynthetic enzyme 2-like, partial [Cucumis sativus]	gi|356567411|ref|XM_003551866.1|	61.9	3e-07	PREDICTED: Glycine max probable rhamnose biosynthetic enzyme 1-like (LOC100810341), mRNA	sp|Q9LH76|RHM3_ARATH	81.6	1e-16	Probable rhamnose biosynthetic enzyme 3 OS=Arabidopsis thaliana GN=RHM3 PE=1 SV=1	K12450	1e-17	86.3	bdi:100829812	UDP-glucose 4,6-dehydratase [EC:4.2.1.76]
Unigene28404_Codonopsis	gi|255548608|ref|XP_002515360.1|	241.5	3e-63	dtdp-glucose 4,6-dehydratase, putative [Ricinus communis] >gi|223545304|gb|EEF46809.1| dtdp-glucose 4,6-dehydratase, putative [Ricinus communis]	gi|460399561|ref|XR_183029.1|	214	5e-53	PREDICTED: Solanum lycopersicum probable rhamnose biosynthetic enzyme 1-like (LOC101248505), misc_RNA	sp|Q9LPG6|RHM2_ARATH	225	6e-60	Probable rhamnose biosynthetic enzyme 2 OS=Arabidopsis thaliana GN=RHM2 PE=1 SV=1	K12450	2e-63	238	pop:POPTR_583125	UDP-glucose 4,6-dehydratase [EC:4.2.1.76]
Unigene7955_Codonopsis	gi|225461808|ref|XP_002285634.1|	1250	0	PREDICTED: probable rhamnose biosynthetic enzyme 1 [Vitis vinifera]	gi|356556633|ref|XM_003546580.1|	749	0	PREDICTED: Glycine max probable rhamnose biosynthetic enzyme 1-like (LOC100785885), mRNA	sp|Q9SYM5|RHM1_ARATH	1203	0	Probable rhamnose biosynthetic enzyme 1 OS=Arabidopsis thaliana GN=RHM1 PE=1 SV=1	K12450	0	1249	vvi:100260586	UDP-glucose 4,6-dehydratase [EC:4.2.1.76]

## Sheet: UER
geneID	Nr-ID	Nr-Score	Nr-Evalue	Nr-annotation	Nt-ID	Nt-Score	Nt-Evalue	Nt-annotation	Swissprot-ID	Swissprot-Score	Swissprot-Evalue	Swissprot-annotation	KO_id	KEGG-Evalue	KEGG-Score	KEGG-Gene	ko_definition
Unigene12223_Codonopsis	gi|211906440|gb|ACJ11713.1|	550.8	1e-155	UDP-L-rhamnose synthase [Gossypium hirsutum]	gi|211906439|gb|FJ415167.1|	420	1e-114	Gossypium hirsutum clone Spot12 UDP-L-rhamnose synthase mRNA, complete cds	sp|Q9SYM5|RHM1_ARATH	489	1e-138	Probable rhamnose biosynthetic enzyme 1 OS=Arabidopsis thaliana GN=RHM1 PE=1 SV=1	K12451	3e-155	546	aly:ARALYDRAFT_893174	3,5-epimerase/4-reductase [EC:5.1.3.- 1.1.1.-]

## Sheet: UGLcAE
geneID	Nr-ID	Nr-Score	Nr-Evalue	Nr-annotation	Nt-ID	Nt-Score	Nt-Evalue	Nt-annotation	Swissprot-ID	Swissprot-Score	Swissprot-Evalue	Swissprot-annotation	KO_id	KEGG-Evalue	KEGG-Score	KEGG-Gene	ko_definition
Unigene14917_Codonopsis	gi|225433491|ref|XP_002265088.1|	804.7	0	PREDICTED: UDP-glucuronate 4-epimerase 6 [Vitis vinifera]	gi|225433490|ref|XM_002265052.1|	458	1e-125	PREDICTED: Vitis vinifera UDP-glucuronate 4-epimerase 6-like (LOC100241904), mRNA	sp|Q9LIS3|GAE6_ARATH	728	0	UDP-glucuronate 4-epimerase 6 OS=Arabidopsis thaliana GN=GAE6 PE=1 SV=1	K08679	0	804	vvi:100241904	UDP-glucuronate 4-epimerase [EC:5.1.3.6]
Unigene15345_Codonopsis	gi|255574623|ref|XP_002528222.1|	817.8	0	UDP-glucuronate 5-epimerase, putative [Ricinus communis] >gi|223532383|gb|EEF34179.1| UDP-glucuronate 5-epimerase, putative [Ricinus communis]	gi|470120670|ref|XM_004296372.1|	579	1e-162	PREDICTED: Fragaria vesca subsp. vesca UDP-glucuronate 4-epimerase 1-like (LOC101293767), mRNA	sp|Q9M0B6|GAE1_ARATH	775	0	UDP-glucuronate 4-epimerase 1 OS=Arabidopsis thaliana GN=GAE1 PE=1 SV=1	K08679	0	817	rcu:RCOM_0782170	UDP-glucuronate 4-epimerase [EC:5.1.3.6]
Unigene16305_Codonopsis	gi|460367892|ref|XP_004229804.1|	755.4	0	PREDICTED: UDP-glucuronate 4-epimerase 3-like [Solanum lycopersicum]	gi|292747023|dbj|AK337039.1|	488	1e-134	Lotus japonicus cDNA, clone: LjFL1-041-BA10, HTC	sp|O81312|GAE3_ARATH	738	0	UDP-glucuronate 4-epimerase 3 OS=Arabidopsis thaliana GN=GAE3 PE=2 SV=1	K08679	0	748	vvi:100247175	UDP-glucuronate 4-epimerase [EC:5.1.3.6]
Unigene16306_Codonopsis	gi|449432263|ref|XP_004133919.1|	785.8	0	PREDICTED: UDP-glucuronate 4-epimerase 3-like [Cucumis sativus]	gi|257900560|gb|AC119419.11|	581	1e-162	Medicago truncatula clone mth2-6b12, complete sequence	sp|O81312|GAE3_ARATH	762	0	UDP-glucuronate 4-epimerase 3 OS=Arabidopsis thaliana GN=GAE3 PE=2 SV=1	K08679	0	781	vvi:100247175	UDP-glucuronate 4-epimerase [EC:5.1.3.6]

## Sheet: AXS
geneID	Nr-ID	Nr-Score	Nr-Evalue	Nr-annotation	Nt-ID	Nt-Score	Nt-Evalue	Nt-annotation	Swissprot-ID	Swissprot-Score	Swissprot-Evalue	Swissprot-annotation	KO_id	KEGG-Evalue	KEGG-Score	KEGG-Gene	ko_definition
Unigene14947_Codonopsis	gi|356543530|ref|XP_003540213.1|	733	0	PREDICTED: bifunctional polymyxin resistance protein ArnA-like [Glycine max]	gi|225465763|ref|XM_002266594.1|	779	0	PREDICTED: Vitis vinifera bifunctional polymyxin resistance protein ArnA-like (LOC100262362), mRNA	sp|Q9LPG6|RHM2_ARATH	67.8	2e-11	Probable rhamnose biosynthetic enzyme 2 OS=Arabidopsis thaliana GN=RHM2 PE=1 SV=1	K12449	0	733	gmx:100792879	UDP-apiose/xylose synthase

[truncated: 4 more sheets: UXE, UGE, GME, UGDH]
