# Supplementary material for: Transcriptome Sequencing of Codonopsis pilosula and Identification of Candidate Genes Involved in Polysaccharide Biosynthesis
Source: PLoS One. 2015 Feb 26;10(2):e0117342. doi: 10.1371/journal.pone.0117342 (PMC4342239; doi:10.1371/journal.pone.0117342)
Supplement: S6 Table — (XLS) [file pone.0117342.s009.xls]

## Sheet: Sheet1
Gene symbol	Gene name	Primer sequcence(5’-3’)	Product size (bp)	PCR efficient(%)	Mean expression stability (Rank by geNorm)	Stability (Rank by NormFinder software)	CV±SD (Rank by BestKeeper software)
GAPDH	glyceraldehyde-3-phosphate dehydrogenase	F:TGCTTCGTTCAACATCATTC	164	99.3	0.907916	0.0160729	1.63±0.32
		R:CATAACTGGCTGCCTTCTCC
β-tublin	Tubulin beta-2 chain	F:TCTGTGACATTCCTCCTACT	100	97.9	0.903038	0.0167135	3.73±0.8
		R:GTGAACTGCTCGCTAACCCT
F-BOX	F-box/kelch-repeat protein	F:TGCGGACCACTATCACTTGC	171	95	0.945969	0.025	3.86±0.8
		R:TGCTTGGGGTTGCCCTAATT
CACS	clathrin adaptor complex subunit	TTGTAATAAACAGCGTGGATGC	145	98.7	1.40523	0.058433	3.26±0.65
		GTGAGTTCAATCAAGAAAGGGA
